# Supplementary material for: Facile resolution of racemic terbutaline and a study of molecular recognition through chiral supramolecules based on enantiodifferentiating self-assemblyElectronic supplementary information (ESI) available: 1) 1H and 13C NMR analyses of (R)-1·4 and (S)-1·4; 2) ORTEP views and stacking structures of crystals 5, 7 and 8; 3) DSC and TG analyses of the more- and less-soluble salts. See http://www.rsc.org/suppdata/ob/b2/b211327a/
Source: Royal Society of Chemistry journal article supplement (doi:10.1039/b211327a), 2003-02-20
Supplement: b211327a.pdf [file b211327a.pdf]

## Supporting Information

### Facile Resolution of Racemic Terbutaline and A Study of Molecular Recognition through Chiral Supramolecules Based on Enantiodifferentiating Self-Assembly

Jian Liao, Xiaohua Peng, Juhua Zhang, Kaibei Yu, Xin Cui, Jin Zhu, Jingen Deng\*

Union Laboratory of Asymmetric Synthesis, Chengdu Institute of Organic Chemistry, the Chinese Academy of Sciences, Chengdu 610041

China

#### 1) $^1\text{H}$ and $^{13}\text{C}$ NMR analyses of (*R*)-1.4 and (*S*)-1.4

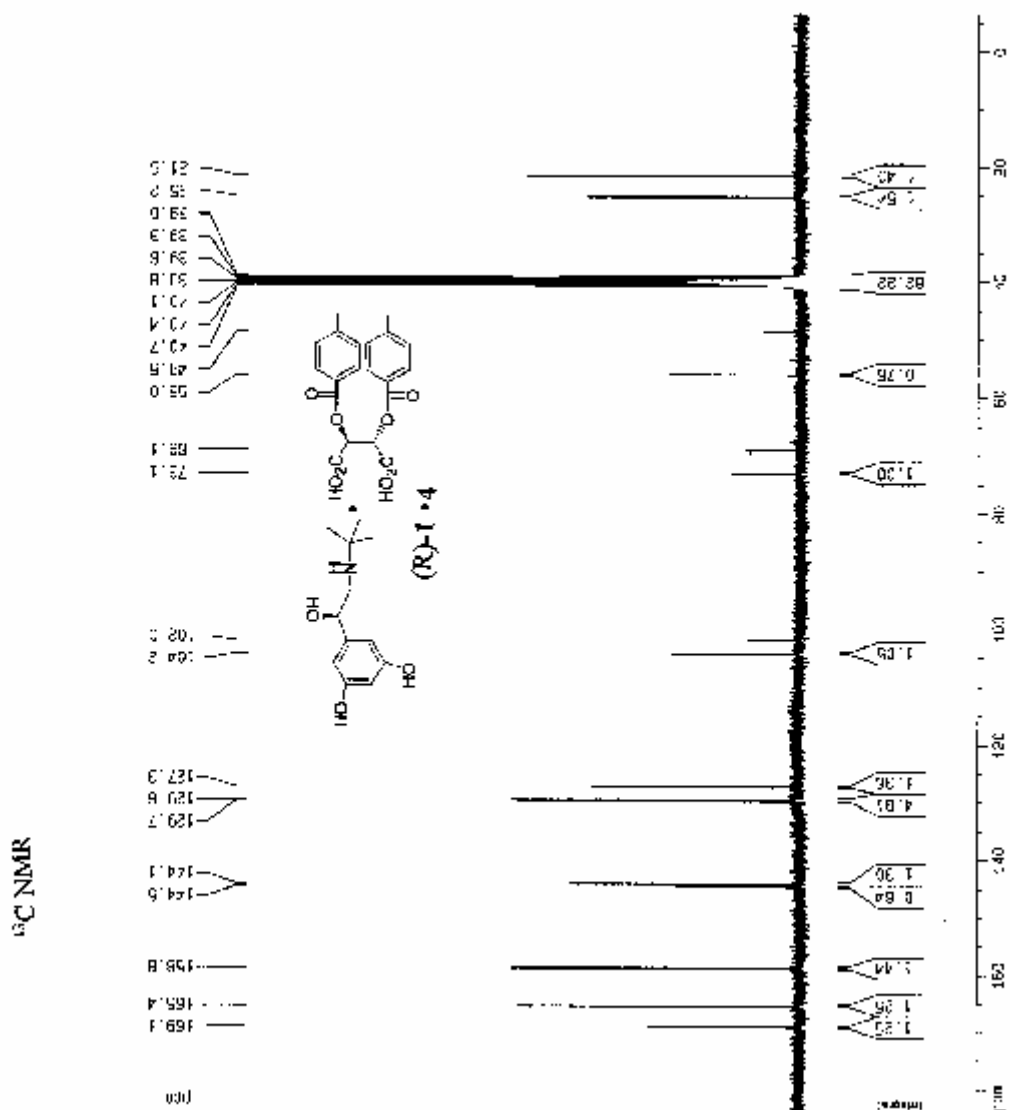

Figure S1.  $^{13}\text{C}$ -NMR spectrum of (*R*)-terbutaline (1) and *D*-DTTA (4)

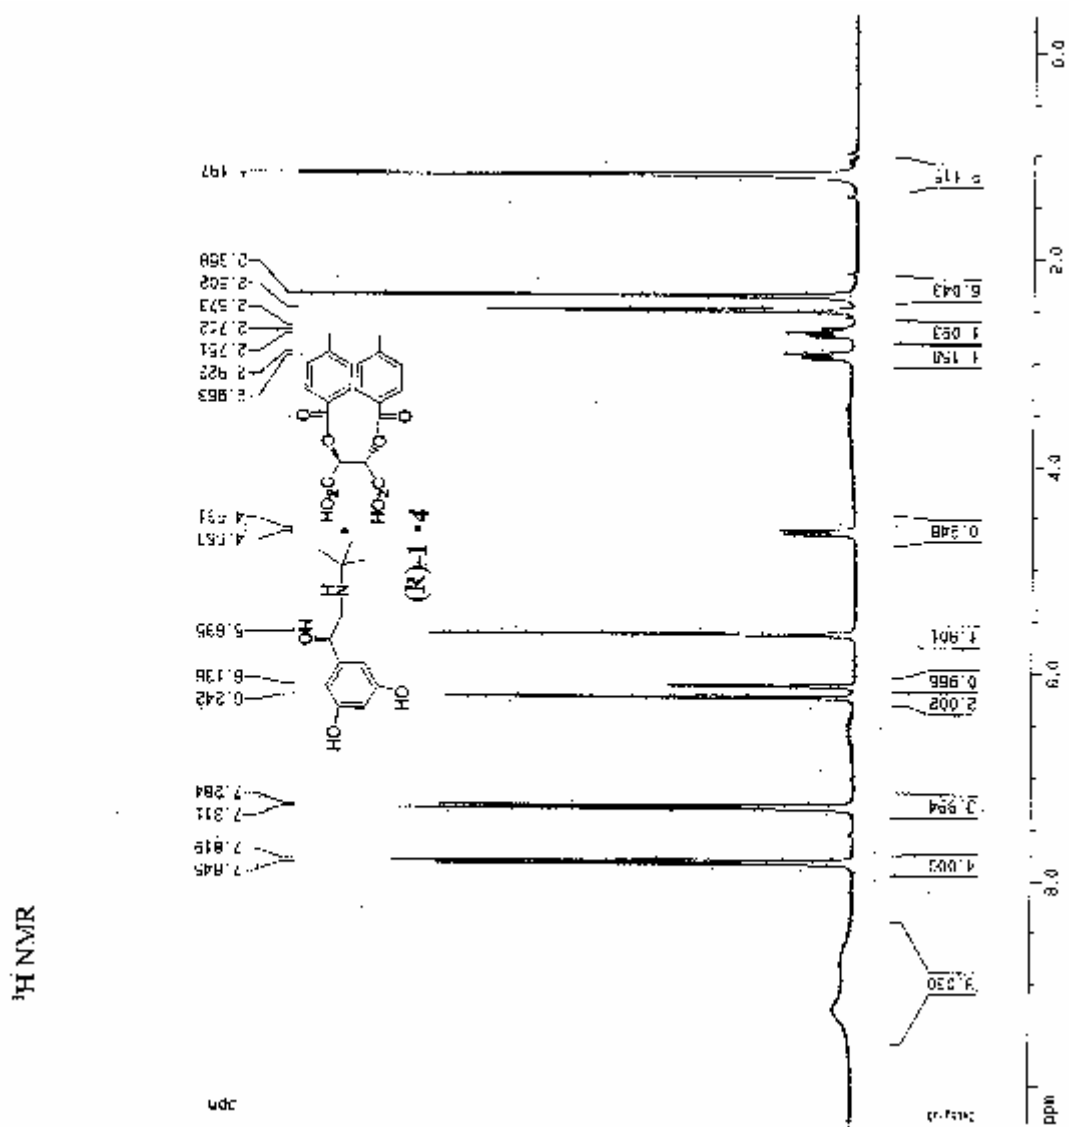

Figure S2. <sup>1</sup>H-NMR spectrum of (*R*)-terbutaline (1) and *D*-DTTA (4)

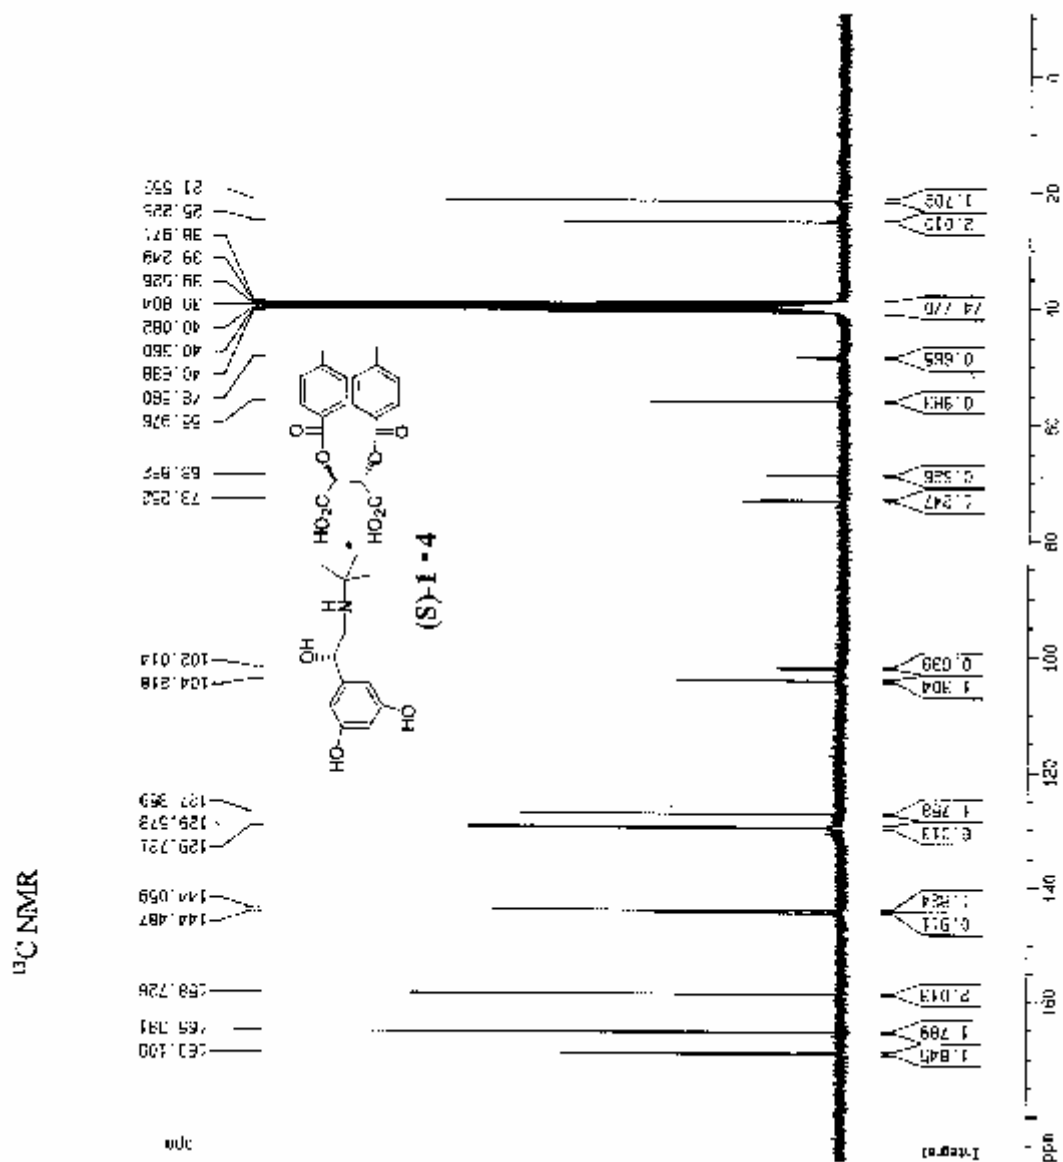

Figure S3. <sup>13</sup>C-NMR spectrum of (*S*)-terbutaline (1) and *D*-DTTA (4)

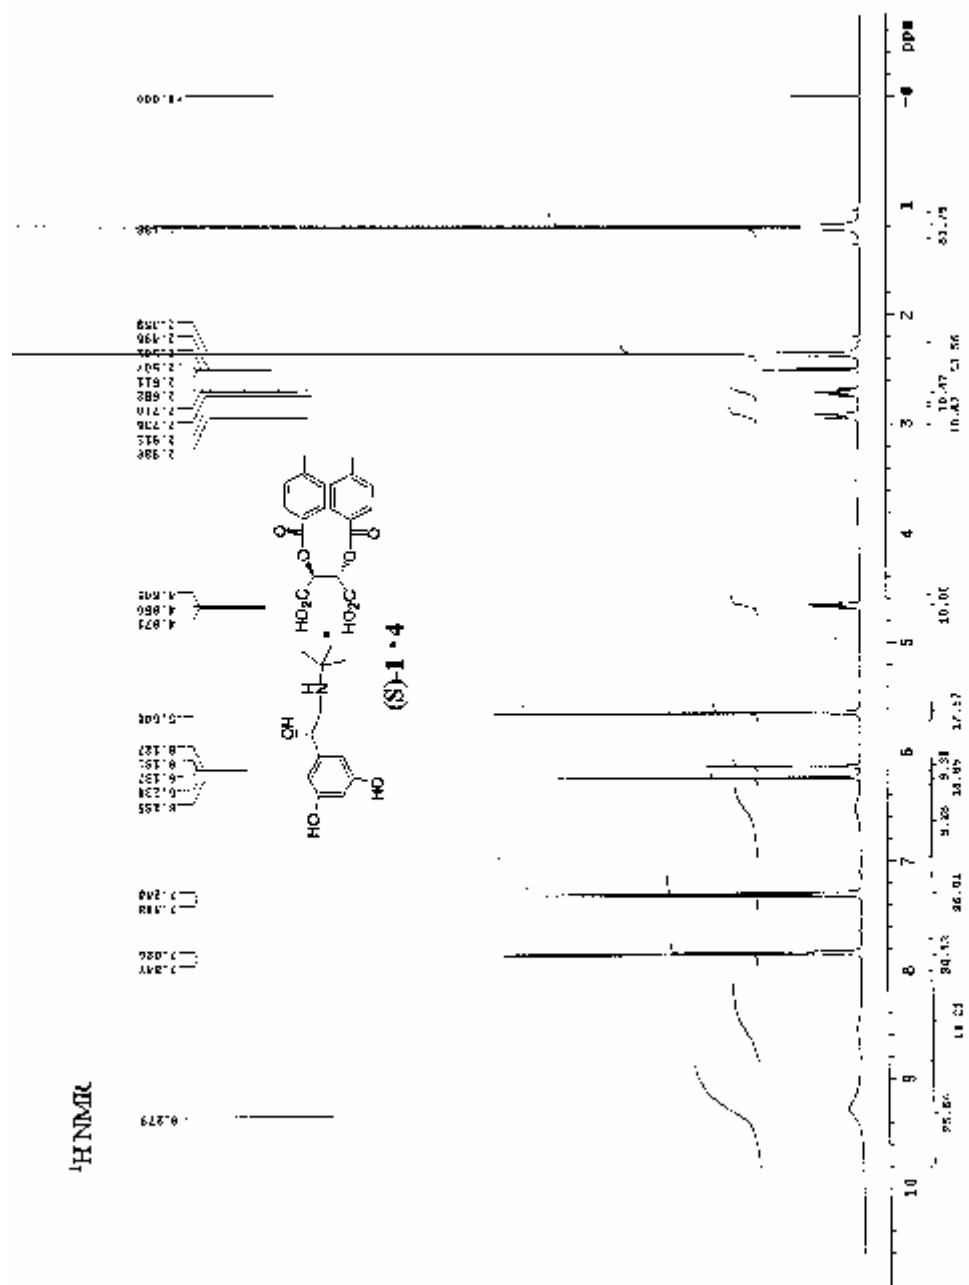

Figure S4. <sup>1</sup>H-NMR spectrum of (*S*)-terbutaline (1) and *D*-DTTA (4)

2) ORTEP views and stacking structures of crystals **5**, **7** and **8**

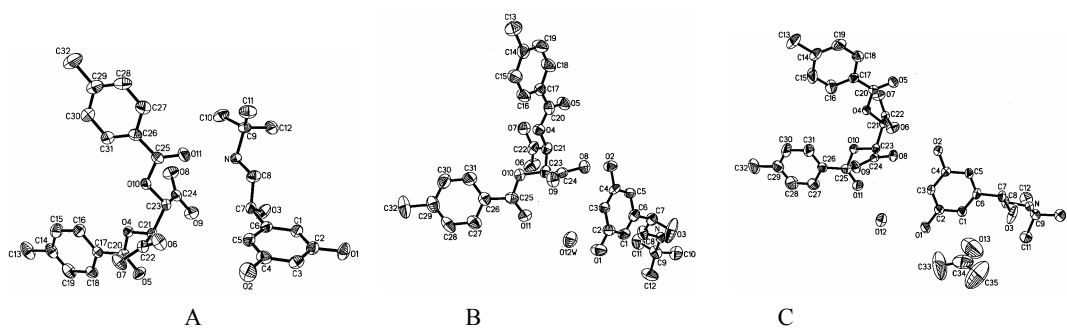

**Figure S5.** ORTEP views of the molecular structure of **5** (A), **7** (B) and **8** (C).

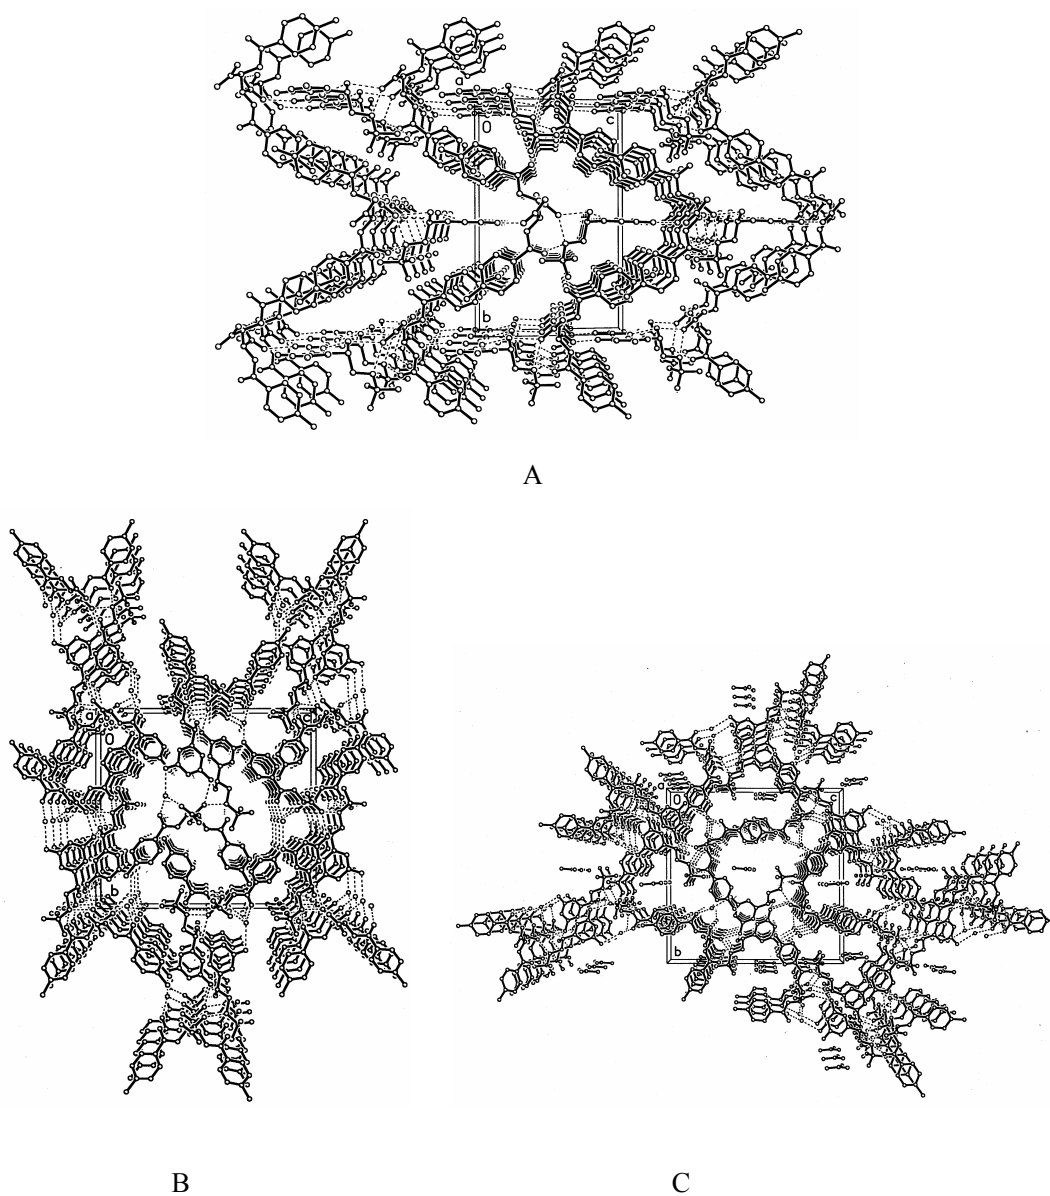

**Figure S6.** Stacking structures of crystals **5** (A), **7** (B) and **8** (C) (top view down the *a* axis). All H-bonds are represented by dotted lined.

### 3) DSC and TG analyses of the more- and less-soluble salts

A) For more-soluble salt

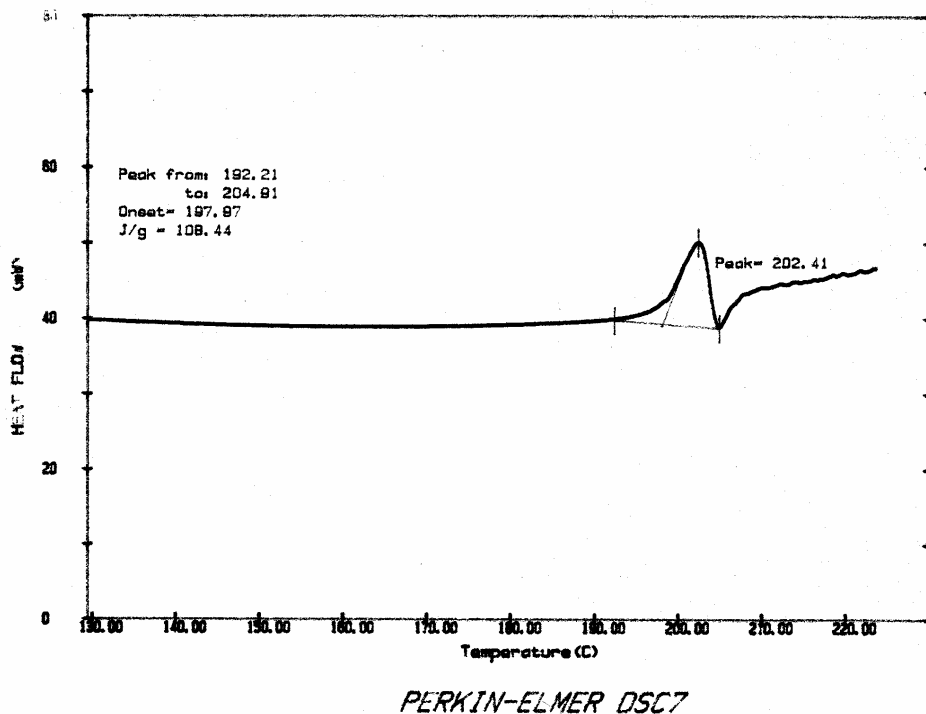

Figure S7. DSC analysis of the more-soluble salt.  $\Delta H_{\text{fus}} = 108.44 \times 611/1000 = 66.2$  KJ/mol

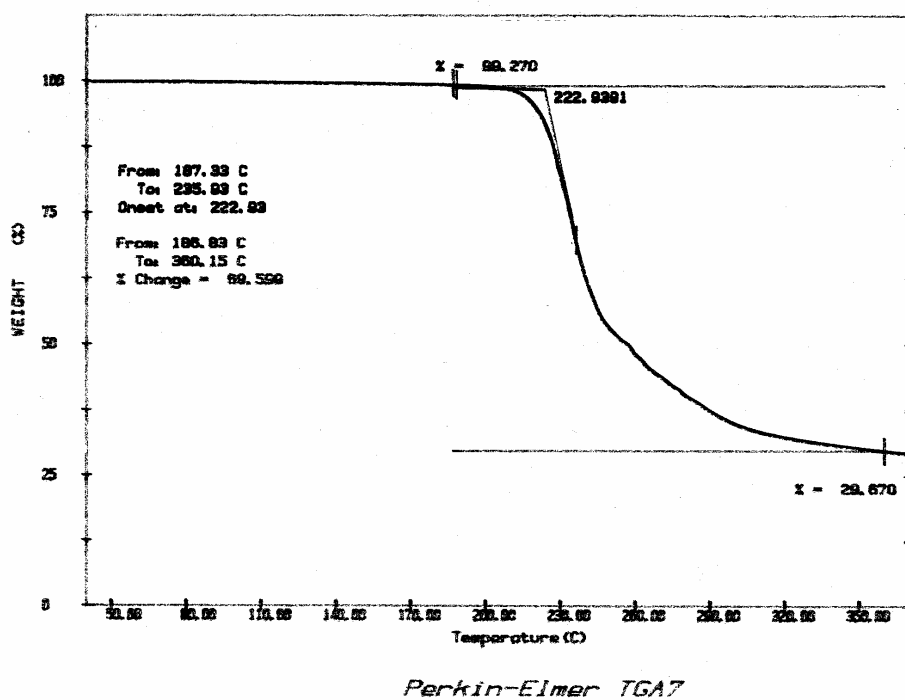

Figure S8. TG analysis of the more-soluble salt

B) For less-soluble salt

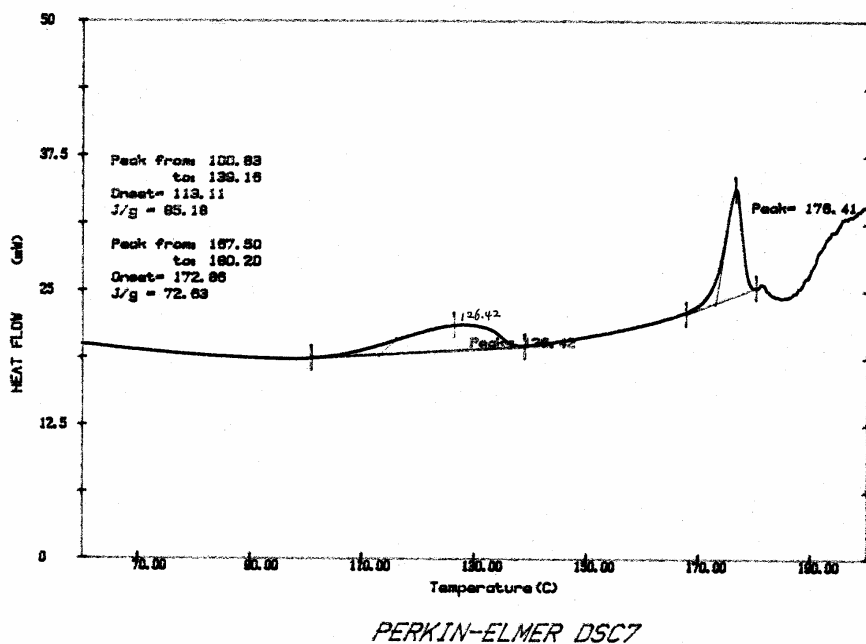

Figure S9. DSC analysis of the less-soluble salt.  $\Delta H_{\text{fus}} = (85.18 \times 629/1000) + (72.63 \times 611/1000) = 53.6 + 44.4 = 98.0$  KJ/mol, the first curve is relative to water loss ( $\Delta H = 53.6$  KJ/mol)

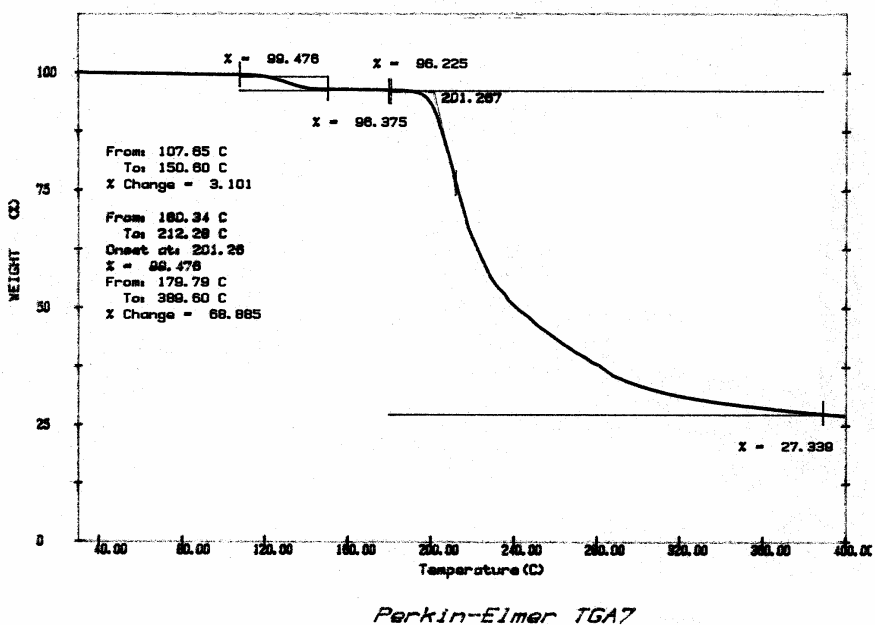

Figure S10. TG analysis of the less-soluble salt
